# Supplementary material for: Photocatalytic ability of visible-light-responsive hybrid ZrO2 particles
Source: Royal Society of Chemistry journal article supplement (doi:10.1039/d3se00175j), 2023-01-01
Supplement: d3se00175j1.pdf [file d3se00175j1.pdf]

## Supporting Information

Photocatalytic ability of visible-light-responsive hybrid ZrO<sub>2</sub> particles

Aleksandra Zarubica,<sup>1</sup> Dušan Sredojević,<sup>2</sup> Radomir Ljupković,<sup>1</sup> Marjan Randjelović,<sup>1</sup> Natalija Murafa,<sup>3</sup> Milovan Stojiljković,<sup>4</sup> Vesna Lazić,<sup>2</sup> Jovan M. Nedeljković,<sup>2\*</sup>

<sup>1</sup>Department of Chemistry, Faculty of Science and Mathematics, University of Niš, Višegradska 33, 18000 Niš, Serbia.

<sup>2</sup>Centre of Excellence for Photoconversion, Vinča Institute of Nuclear Sciences – National Institute of the Republic of Serbia, University of Belgrade, 11000 Belgrade, Serbia.

<sup>3</sup>Institute of Inorganic Chemistry of the Czech Academy of Sciences, 250 68 Husinec-Řež, Czech Republic.

<sup>4</sup>Vinča Institute of Nuclear Sciences – National Institute of the Republic of Serbia, University of Belgrade, 11000 Belgrade, Serbia.

**Supporting Information 1.** The degradation percentages of CV as a function of time under the UV-C light excitation of ZrO<sub>2</sub>/5-ASA and ZrO<sub>2</sub>/5-ASA/Ag (1 mg/mL); initial concentrations of CV: 5.0, 7.5, and 10.0 μM.

| UV-C Lamp  |                         |        |         |                            |        |         |
|------------|-------------------------|--------|---------|----------------------------|--------|---------|
| time (min) | ZrO <sub>2</sub> /5-ASA |        |         | ZrO <sub>2</sub> /5-ASA/Ag |        |         |
|            | 5 μM                    | 7.5 μM | 10.0 μM | 5 μM                       | 7.5 μM | 10.0 μM |
| 0          | 0.0                     | 0.0    | 0.0     | 0.0                        | 0.0    | 0.0     |
| 15         | 65.0                    | 55.5   | 61.8    | 89.4                       | 74.0   | 67.5    |
| 30         | 84.4                    | 65.5   | 71.6    | 100.0                      | 84.3   | 73.3    |
| 60         | 100.0                   | 82.8   | 80.1    | 100.0                      | 95.7   | 80.6    |
| 120        | 100.0                   | 96.4   | 87.5    | 100.0                      | 100.0  | 86.7    |

**Supporting Information 2.** The degradation percentages of CV as a function of time under the Vis light excitation of ZrO<sub>2</sub>/5-ASA and ZrO<sub>2</sub>/5-ASA/Ag (1 mg/mL); initial concentrations of CV: 5.0, 7.5, and 10.0 μM.

| Vis Lamp   |                         |        |         |                            |        |         |
|------------|-------------------------|--------|---------|----------------------------|--------|---------|
| time (min) | ZrO <sub>2</sub> /5-ASA |        |         | ZrO <sub>2</sub> /5-ASA/Ag |        |         |
|            | 5 μM                    | 7.5 μM | 10.0 μM | 5 μM                       | 7.5 μM | 10.0 μM |
| 0          | 0.0                     | 0.0    | 0.0     | 0.0                        | 0.0    | 0.0     |
| 15         | 51.2                    | 36.2   | 32.9    | 84.8                       | 64.3   | 57.4    |
| 30         | 64.8                    | 46.3   | 37.3    | 91.2                       | 70.3   | 64.9    |
| 60         | 72.3                    | 51.8   | 43.1    | 100.0                      | 72.4   | 68.5    |
| 120        | 82.5                    | 68.0   | 54.7    | 100.0                      | 78.6   | 74.9    |
